# Supplementary material for: Human MSCs promotes colorectal cancer epithelial–mesenchymal transition and progression via CCL5/β-catenin/Slug pathway
Source: PubMed Central journal article supplement (PMC5520690; doi:10.1038/cddis.2017.138), 2017-05-25

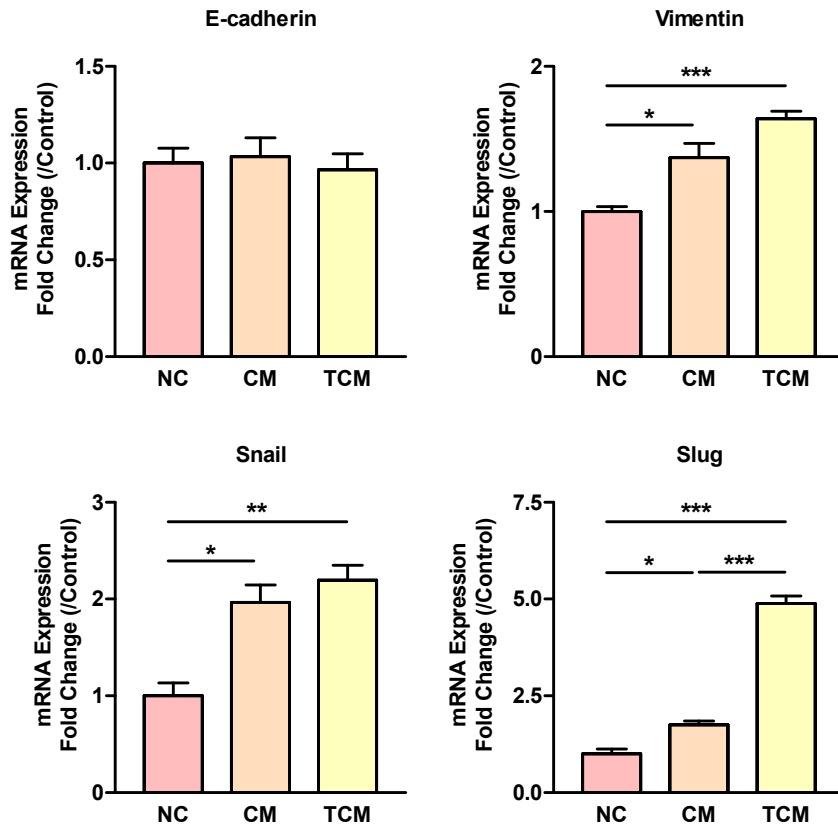

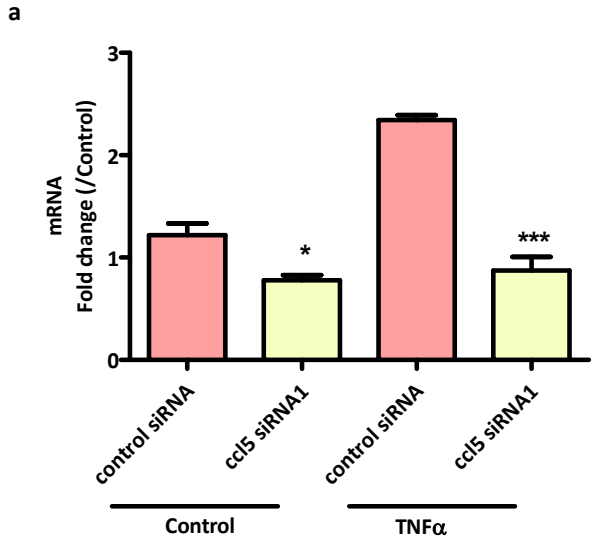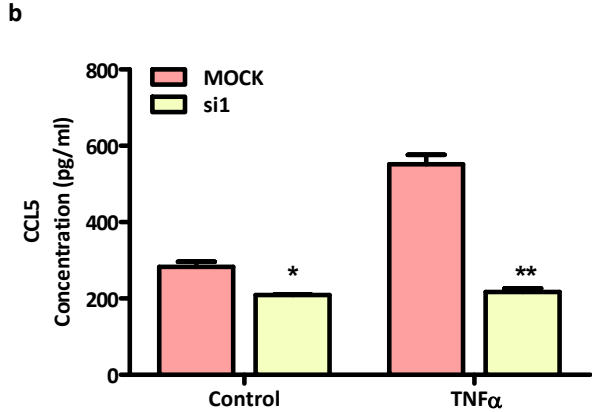

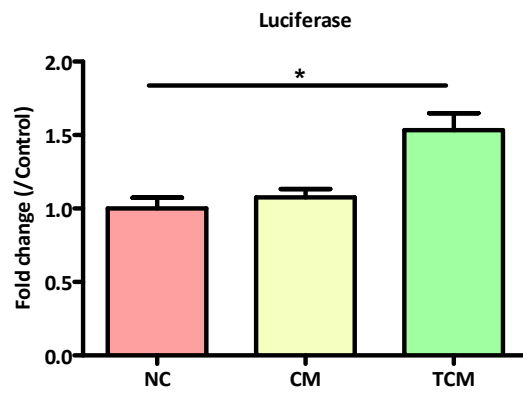

Supplement: cddis2017138x1.pdf [file cddis2017138x1.pdf]
