# Supplementary material for: Human MSCs promotes colorectal cancer epithelial–mesenchymal transition and progression via CCL5/β-catenin/Slug pathway
Source: PubMed Central journal article supplement (PMC5520690; doi:10.1038/cddis.2017.138), 2017-05-25
Supplement: cddis2017138x2.pdf [file cddis2017138x2.pdf]

| Supplementary Table 1: Primers used for the experiment |                          |                          |                      |                      |
|--------------------------------------------------------|--------------------------|--------------------------|----------------------|----------------------|
|                                                        | <b>Forward (5' - 3')</b> | <b>Reverse (5' - 3')</b> | <b>Expected size</b> | <b>Accession no.</b> |
| h-CCL5-rt2                                             | GCTGCTTTGCCTACATT        | CATTTCTTCTCTGGGTTG       | 142 bp               | NM_002985.2          |
| h-CCR1                                                 | CACCAATCAGTGTGAGCAGAG    | AGCAGAGAGCTCATGTTCTCCT   | 253bp                | NM_001295.2          |
| h-CCR3                                                 | TCGTTCTCCCTCTGCTCG       | AGATGCTTGCTCCGCTCA       | 214 bp               | NM_001837.3          |
| h-CCR5                                                 | AGGGCTGTGAGGCTTATC       | GTTTGGCAATGTGCTTTT       | 262 bp               | NM_000579.3          |
| h-Slug (SNAI2)                                         | TGACCTGTCTGCAAATGCTC     | TCGGACCCACACATTACCTT     | 145 bp               | NM_003068.4          |
| h-Snai1                                                | TTTACCTTCCAGCAGCCCTA     | CCCCTGTCTCATCTGACA       | 207bp                | NM_005985.3          |
| h-Ecadherin (CDH1)                                     | GCCGAGAGCTACACGTTTAC     | GTCGAGGGAAAAATAGGCTG     | 117 bp               | NM_004360.4          |
| h-Vimentin                                             | GAGAACTTTGCCGTTGAAGC     | TCCAGCAGCTTCTGTAGGT      | 170 bp               | NM_003380.3          |
| h-ZEB1                                                 | CAGTCAGCTGCATCTGTAACAC   | CCAGGTGTAAGCGCAGAAAG     | 145 bp               | NM_030751.5          |
| h-bcatenin (CTNNB1)                                    | CGCTGGATTTTCAAAACAGT     | CTGAGGAGCAGCTTCAGTCC     | 130 bp               | NM_001904.3          |
| h-GAPDH                                                | AGGGTCATCATCTCTGCC       | CCATCACGCCACAGTTTC       | 245 bp               | NM_002046            |
